# Supplementary material
Source: publisher figshare collection journal article supplement (https://sage.figshare.com/ndownloader/files/23296982)
Supplement: Supplementary file 1 [file 23296982]

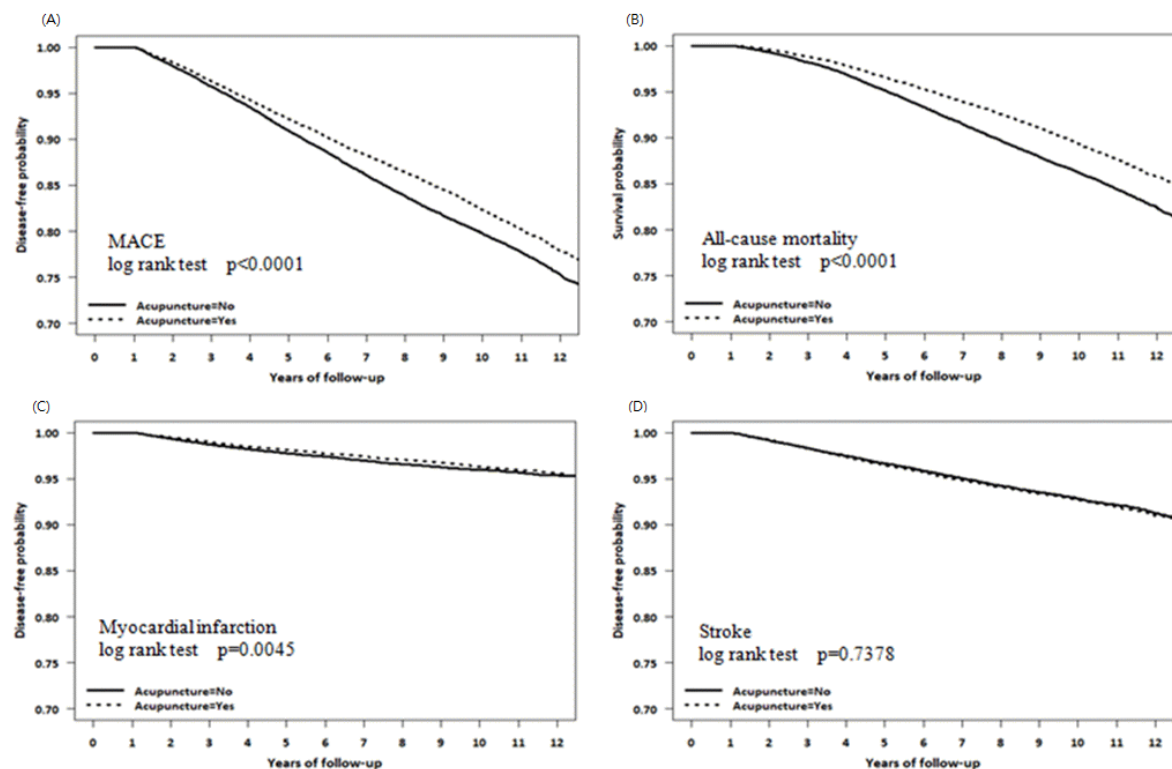

**Supplementary figure 1** Kaplan–Meier curves on disease-free probability of cardiovascular incidence events among the acupuncture group and non-acupuncture group in patients with hypertension after PSM. Legend: A: MACE (Log rank test,  $p < 0.0001$ ). B: All-cause mortality ( $p < 0.0001$ ). C: Myocardial infarction (Log rank test,  $p = 0.0045$ ). D: Stroke (Log rank test,  $p = 0.7378$ ). MACE indicates Major Adverse Cardiovascular Events; PSM, Propensity Score Matching.
